# Supplementary material
Source: publisher figshare collection journal article supplement (https://acs.figshare.com/ndownloader/files/4165432)
Supplement: Supplementary file 1 [file 4165432]

Supporting Information for

# A Graphene-based High-efficiency SERS-active Platform for Sensitive and Multiplex DNA Detection

*Shijiang He,<sup>†</sup> Keng-Ku Liu,<sup>‡</sup> Shao Su,<sup>†</sup> Juan Yan,<sup>†</sup> Xiuhai Mao,<sup>†</sup> Dongfang Wang,<sup>†</sup>*

*Yao He,<sup>§</sup> Lain-Jong Li,<sup>‡</sup> Shiping Song,<sup>\*,†</sup> Chunhai Fan<sup>†</sup>*

**This file includes:**

Experimental Section

Figure S1 to S4

Table S1 to S2

## EXPERIMENTAL SECTION

The surface morphology of graphene film on SiO<sub>2</sub>/Si substrate was examined by Optical microscopy and tapping mode atomic force microscopy (AFM) (Veeco Dimension-Ico System, Veeco, USA). The Raman maps for the graphene film was obtained by plotting peak width of the 2D-band (2600-2800 cm<sup>-1</sup>) as the map height using a NT-MDT confocal Raman microscopic system (laser wavelength 473 nm and laser spot size is 0.4 μm).

To prepare the substrate which only has gold nanoparticles (Au NPs) on SiO<sub>2</sub>/Si substrate, a droplet (10 μL) of mixture solution of different diameter Au NPs (15 nm and 50 nm, 0.8 nM and 0.2 nM respectively) was added onto the surface of the SiO<sub>2</sub>/Si substrate. After the evaporation of water, the resulting substrate was referred to Au-SiO<sub>2</sub>/Si substrate (Figure S2).

The measurement of the contact angle (CA) of water droplet on graphene film has been carried out under ambient conditions using a Theta Lite optical tensiometer (BiolinScientific, Sweden). A de-ionized water (Milli-Q water) droplet (4 μL) had been released onto the graphene film on SiO<sub>2</sub>/Si (300 nm thick SiO<sub>2</sub>) substrate from a syringe needle. The image of the liquid droplet was obtained in real time by using a CCD camera (Figure S4). A tangent line has been drawn onto the droplet from the droplet-graphene interface in the image using software coupled within the instrument, and the angle between the tangent line and the baseline indicates the contact angle of the solid and liquid interface. Three different spots on the same graphene film

substrate were measured and three piece of graphene film substrate were used in the experiment. All the CA data was shown in Table S2.

**Enhancement factor:** We estimated the enhancement factor (EF) of the Au-G-SiO<sub>2</sub>/Si substrate with respect to the SiO<sub>2</sub>/Si substrate through the following expression:<sup>1,2</sup>

$$EF = (I_{\text{SERS}} \times N_{\text{Si}}) / (I_{\text{Si}} \times N_{\text{SERS}})$$

Where  $I_{\text{SERS}}$  is the peak intensity of Cy3 labeled DNA at 1480 cm<sup>-1</sup> band on the Au-G-SiO<sub>2</sub>/Si substrate and  $I_{\text{Si}}$  is noise intensity which is the maximum possible signal from the Cy3 labeled DNA attached onto the SiO<sub>2</sub>/Si substrate.  $N_{\text{Si}}$  is the number of molecules on SiO<sub>2</sub>/Si substrate,  $N_{\text{SERS}}$  is the number of molecules on Au-G-SiO<sub>2</sub>/Si substrate.

For our Raman setup, the illumination focus has a diameter of  $d = (\lambda/N.A) \times 1.22 = 1.03 \mu\text{m}$  (the 1.22 factor accounts for the deviation of the laser beam from a perfect Gaussian profile), assuming the excitation volume as a cylinder and the laser illuminated area is  $0.83 \times 10^6 \text{ nm}^2$ . Assuming that Cy3 labeled DNA molecules were adsorbed as a monolayer on the surface of SiO<sub>2</sub>/Si substrate and each molecule occupies  $\sim 3 \text{ nm}^2$  (Cy3 is about 1 nm and 15 bp single strand DNA is about 3 nm). So  $N_{\text{Si}}$  is about  $3 \times 10^5$ .

The average diameter of Au NPs on the graphene film is about 30 nm and there are about 10 Au NPs in the area of  $0.25 \times 10^6 \text{ nm}^2$  (Figure 1b). There are about 100 strands of DNA on one Au NPs in solution at the similar condition (diameter of Au NP: 30 nm, spacer: A10, Salt Concentration: 0.3 M NaCl).<sup>3</sup> Assuming that the

efficiency of DNA immobile on the Au-G-SiO<sub>2</sub>/Si substrate is about 50% and 80% of these DNA formed the sandwich complex, there are about 40 Cy3 labeled DNA on one Au NP. Therefore, the calculated  $N_{\text{SERS}}$  is about  $1.3 \times 10^3$ . The ratio of  $I_{\text{SERS}}$  and  $I_{\text{Si}}$  is about 80 at the concentration of 100 nM. Finally, the EF of the Au-G-SiO<sub>2</sub>/Si substrate was calculated to be  $1.8 \times 10^4$ .

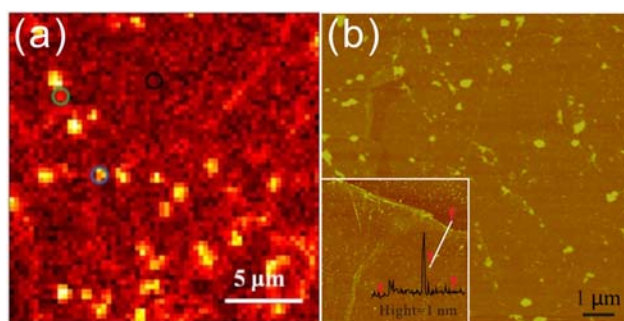

**Figure S1.** (a) Raman map of the graphene film. This map is constructed by plotting peak width of the 2D-band (2600–2800 cm<sup>-1</sup>) as the map height. Colored circles represent the different layer of graphene corresponding to the color in figure 1b (b) AFM image of the transferred graphene taken at the edge of the SiO<sub>2</sub> to measure the graphene height.

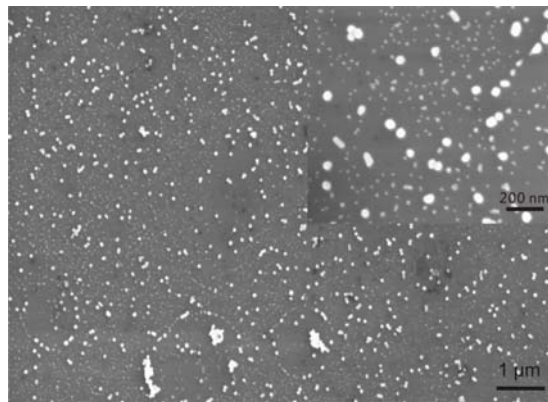

**Figure S2.** SEM image of the surface of Au-SiO<sub>2</sub>/Si substrates.

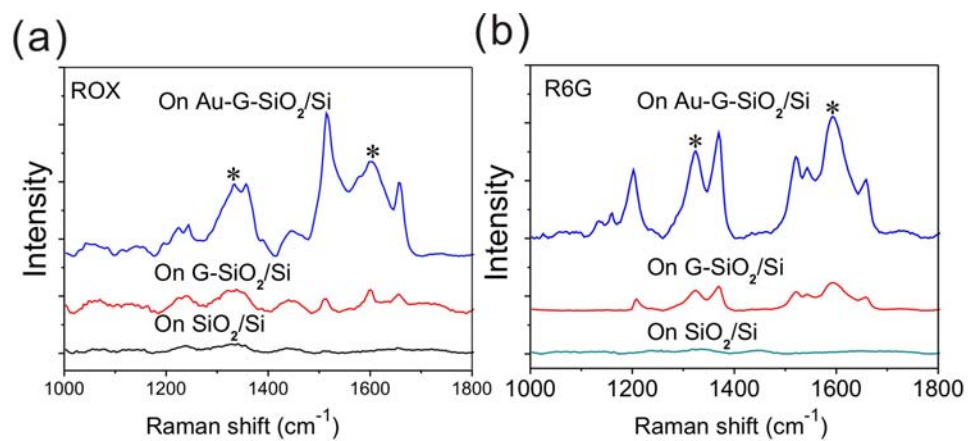

**Figure S3.** Raman spectra of 10  $\mu\text{M}$  ROX (a) and R6G (b) on SiO<sub>2</sub>/Si, G-SiO<sub>2</sub>/Si, and Au-G-SiO<sub>2</sub>/Si substrate. The peaks marked by the star (\*) are the D-band and G-band of graphene.

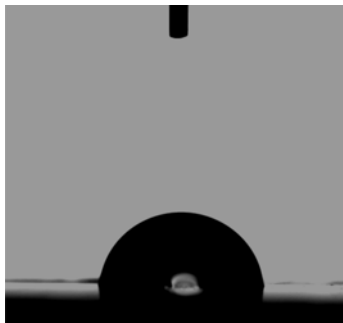

**Figure S4.** A water droplet of 4  $\mu\text{L}$  on graphene film which was on  $\text{SiO}_2/\text{Si}$  (300 nm thick  $\text{SiO}_2$ ) substrate.

**Table S1.** The relative Raman intensity of three dyes on different substrates at the selected Raman peaks.\*

| <b>ROX</b>            | The relative intensity on G- $\text{SiO}_2/\text{Si}$ substrate | The relative intensity on Au- $\text{SiO}_2/\text{Si}$ substrate | The relative intensity on Au-G- $\text{SiO}_2/\text{Si}$ substrate |
|-----------------------|-----------------------------------------------------------------|------------------------------------------------------------------|--------------------------------------------------------------------|
| 1514 $\text{cm}^{-1}$ | 7                                                               | -                                                                | 69                                                                 |
| 1655 $\text{cm}^{-1}$ | 4                                                               | -                                                                | 14                                                                 |
| <b>R6G</b>            |                                                                 |                                                                  |                                                                    |
| 1520 $\text{cm}^{-1}$ | 17                                                              | -                                                                | 73                                                                 |
| 1658 $\text{cm}^{-1}$ | 5                                                               | -                                                                | 23                                                                 |
| <b>Cy3</b>            |                                                                 |                                                                  |                                                                    |
| 1141 $\text{cm}^{-1}$ | 9                                                               | 28                                                               | 32                                                                 |
| 1218 $\text{cm}^{-1}$ | 16                                                              | 68                                                               | 73                                                                 |
| 1401 $\text{cm}^{-1}$ | 7                                                               | 15                                                               | 17                                                                 |
| 1449 $\text{cm}^{-1}$ | 13                                                              | 37                                                               | 41                                                                 |
| 1588 $\text{cm}^{-1}$ | 5                                                               | 26                                                               | 29                                                                 |

\*The Raman signals of these dyes on the  $\text{SiO}_2/\text{Si}$  substrate are set to “1”.

**Table S2.** Average Contact Angle of Graphene film on SiO<sub>2</sub>/Si substrate.

| Number of the graphene film substrate | Contact angle (standard deviation) |
|---------------------------------------|------------------------------------|
| NO.1                                  | 89.7 (3.1)                         |
| NO.2                                  | 91.4 (5.5)                         |
| NO.3                                  | 88.3 (2.3)                         |

## References

- (1) Li, W. Y.; Camargo, P. H. C.; Lu, X. M.; Xia, Y. N. *Nano Lett.* **2009**, *9*, 485.
- (2) Kang, T.; Yoo, S. M.; Yoon, I.; Lee, S. Y.; Kim, B. *Nano Lett.* **2010**, *10*, 1189.
- (3) Hurst, S. J.; Lytton-Jean, A. K.; Mirkin, C. A. *Anal. Chem.* **2006**, *78*, 8313.
